# Supplementary material
Source: PubMed Central journal article supplement (PMC4881391)

Figure S1, Related to Figure 1

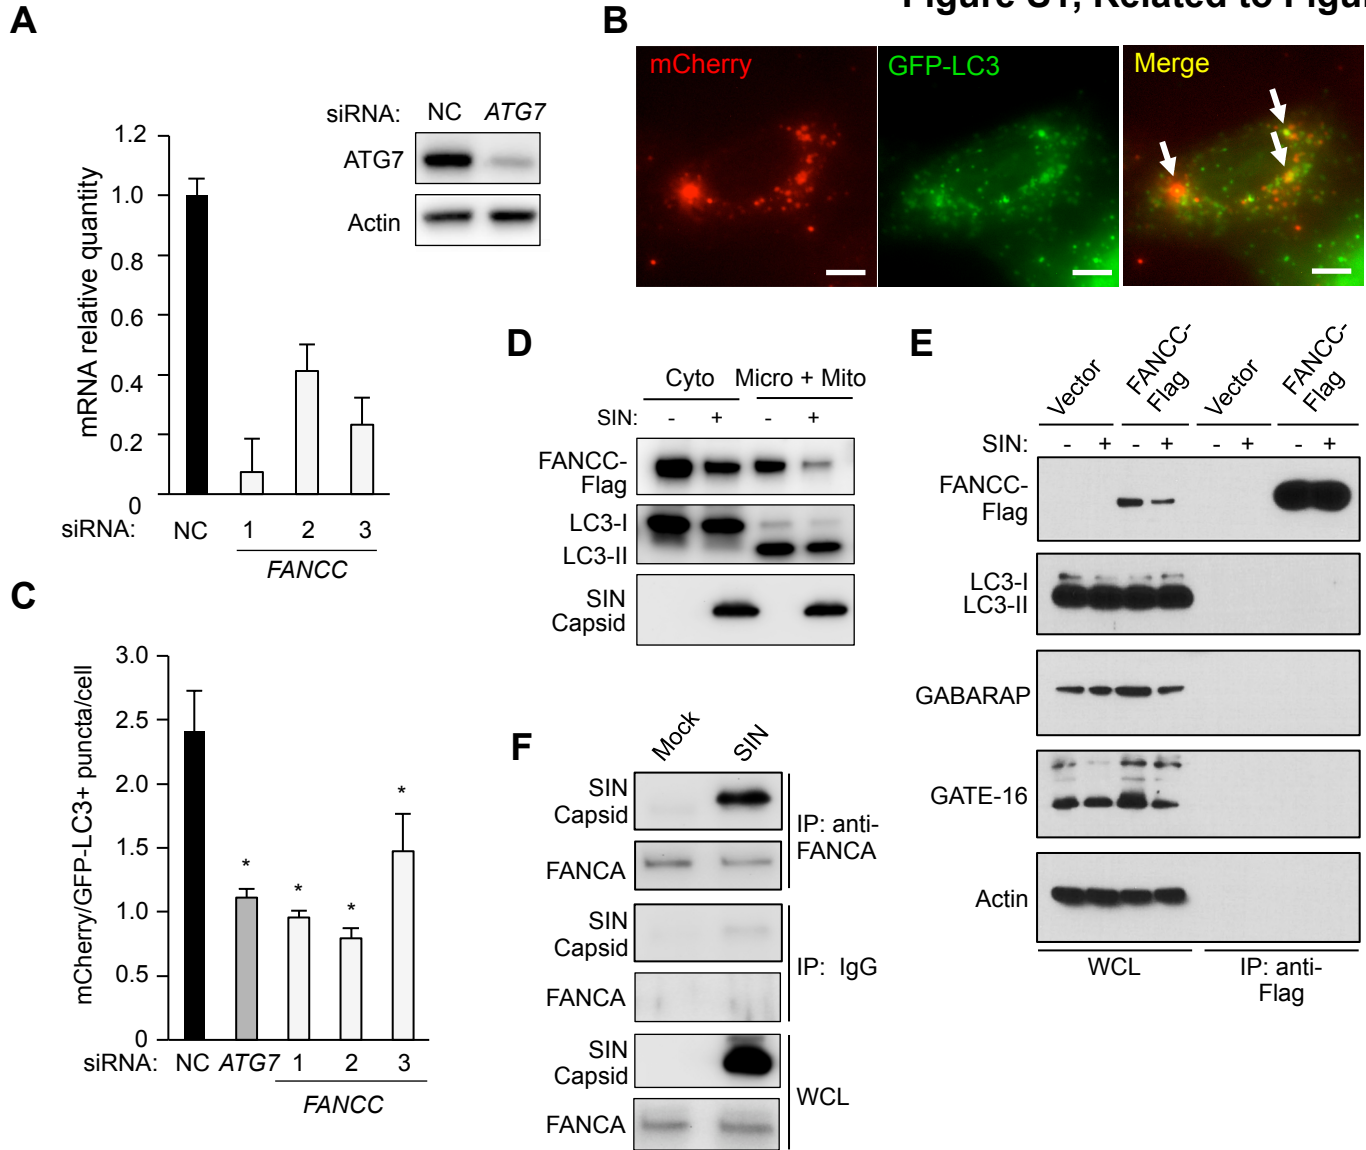

Supplement: NIHMS776370-supplement-1.pdf [file NIHMS776370-supplement-1.pdf]

**Figure S2, Related to Figure 2**

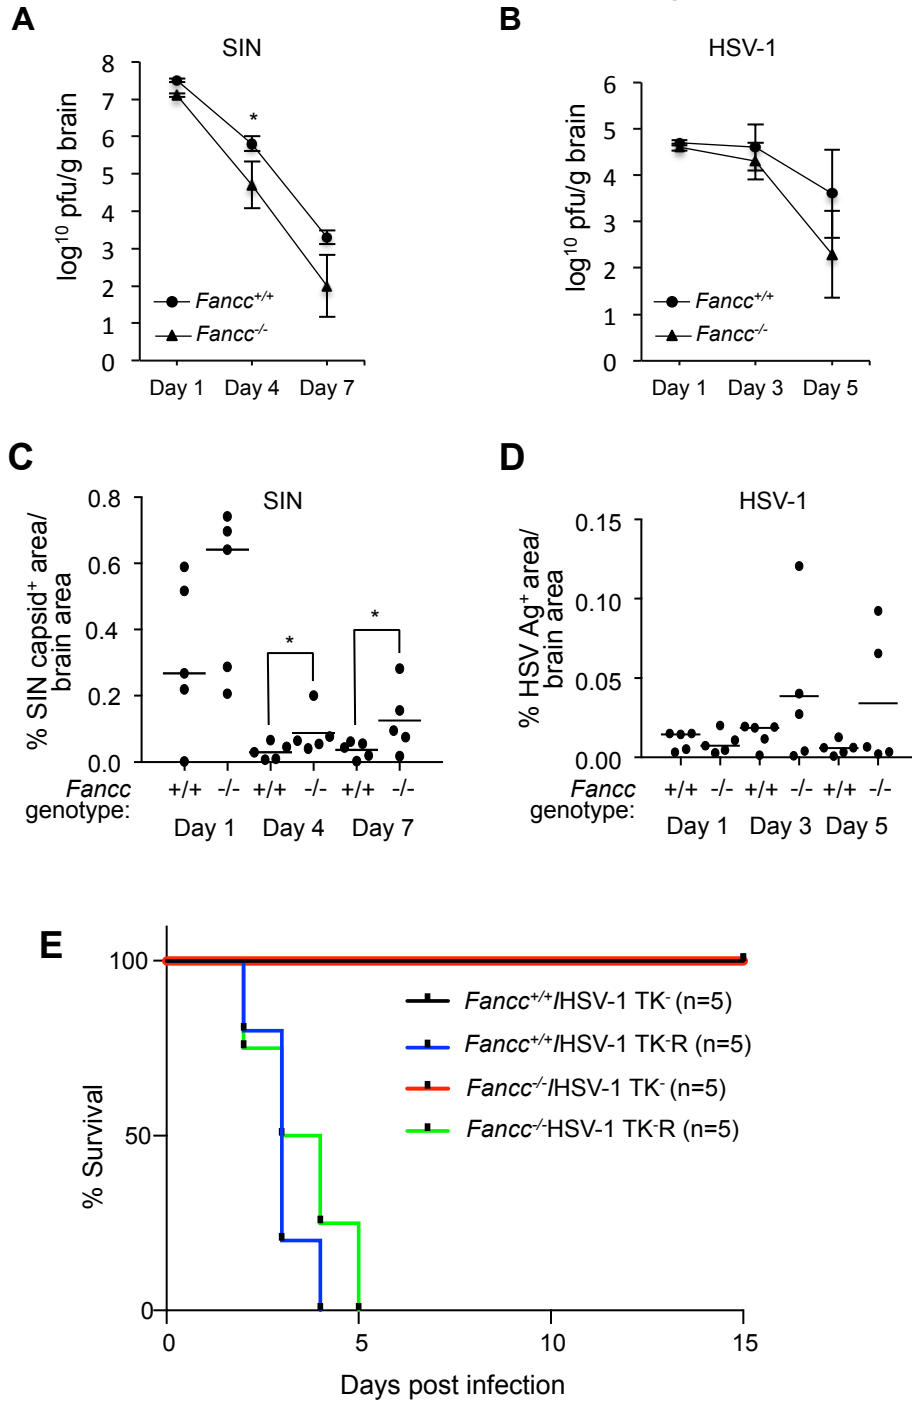

Supplement: NIHMS776370-supplement-2.pdf [file NIHMS776370-supplement-2.pdf]

**Figure S3, Related to Figure 3**

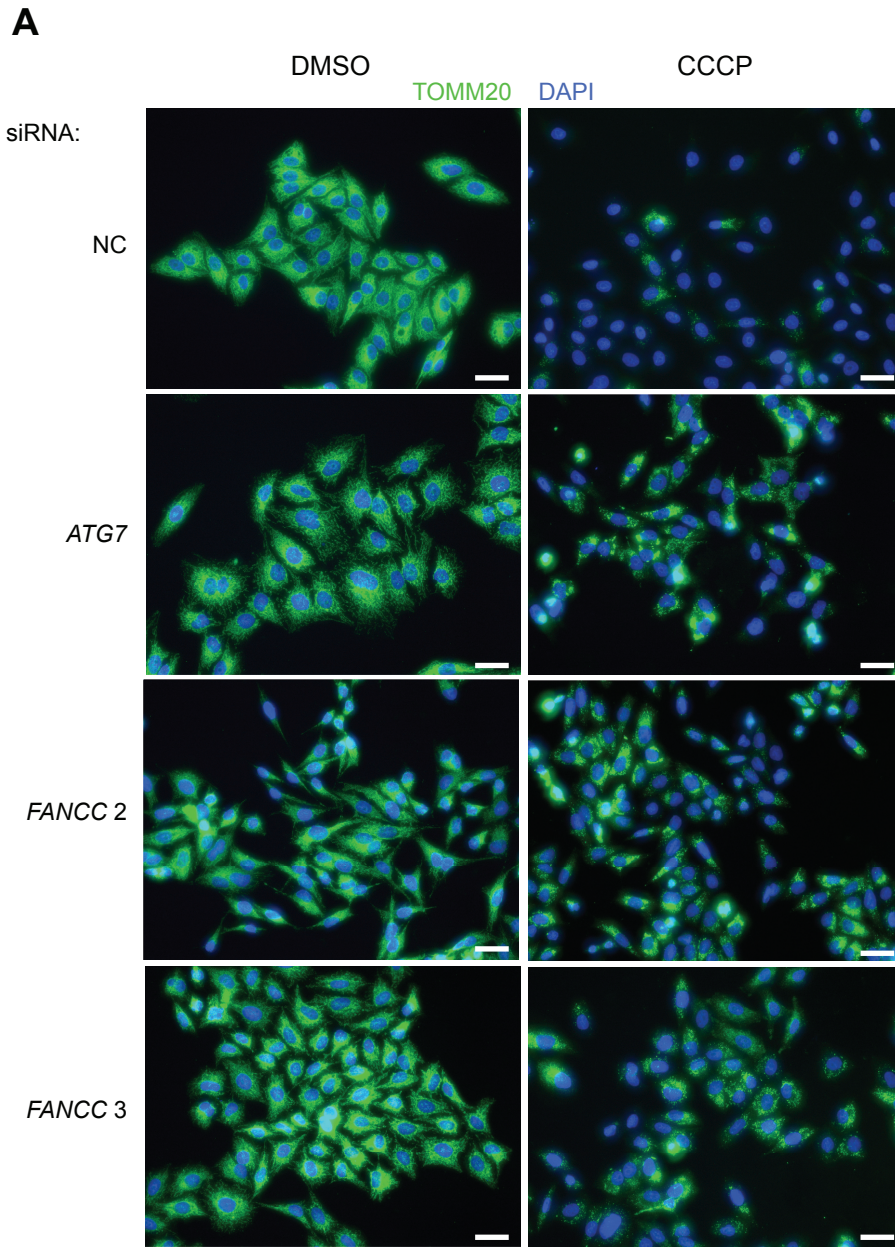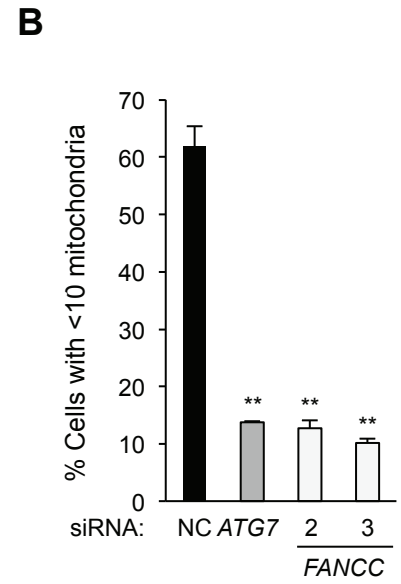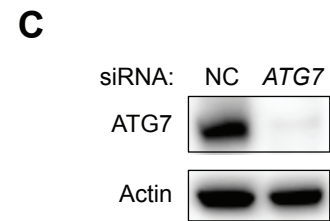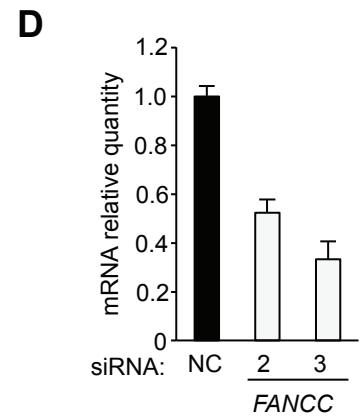

Supplement: NIHMS776370-supplement-3.pdf [file NIHMS776370-supplement-3.pdf]

Figure S4, Related to Figure 4

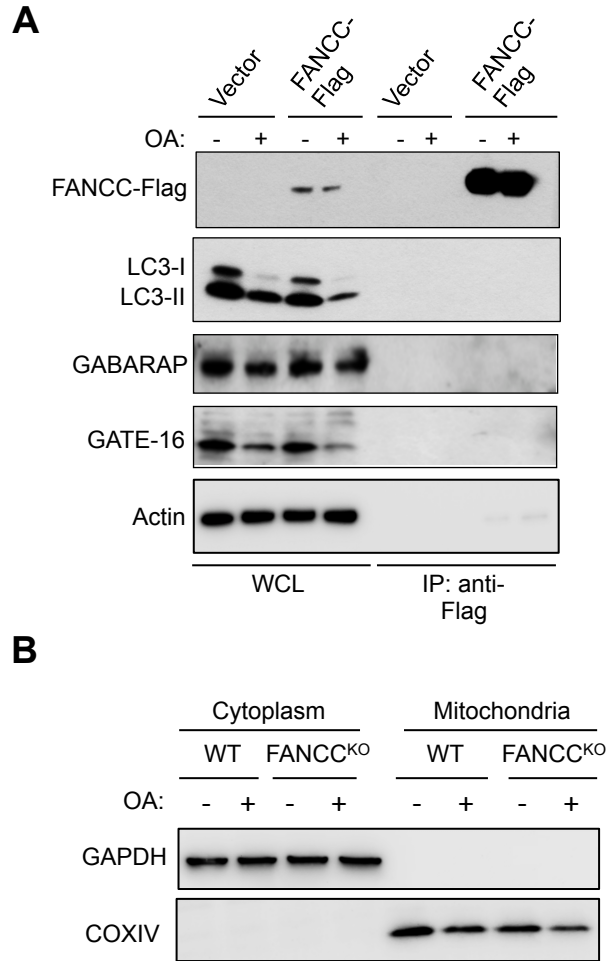

Supplement: NIHMS776370-supplement-4.pdf [file NIHMS776370-supplement-4.pdf]

Figure S5, Related to Figure 5

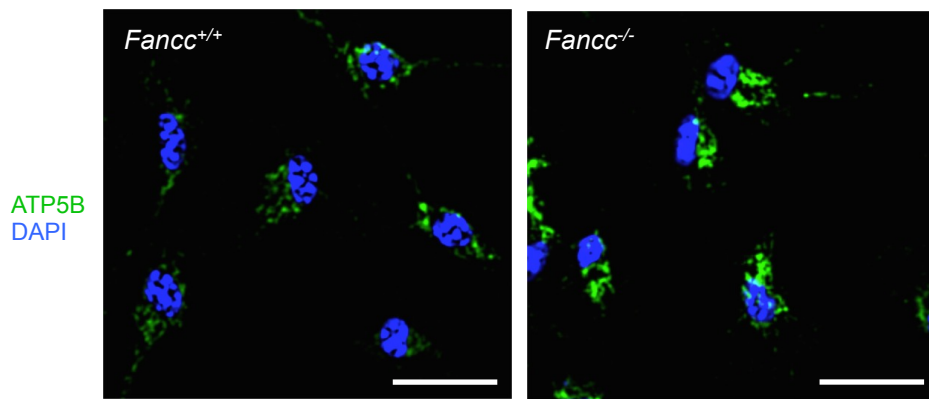

Supplement: NIHMS776370-supplement-5.pdf [file NIHMS776370-supplement-5.pdf]

**Figure S6, Related to Figure 6**

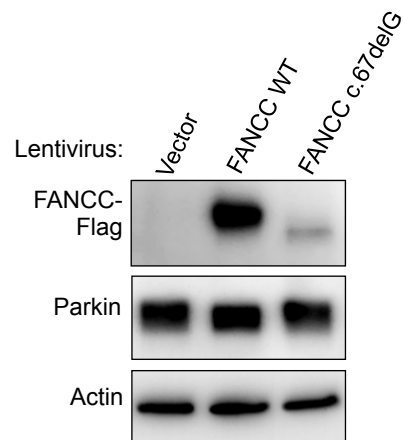

Supplement: NIHMS776370-supplement-6.pdf [file NIHMS776370-supplement-6.pdf]

Figure S7, Related to Figure 7

**A**

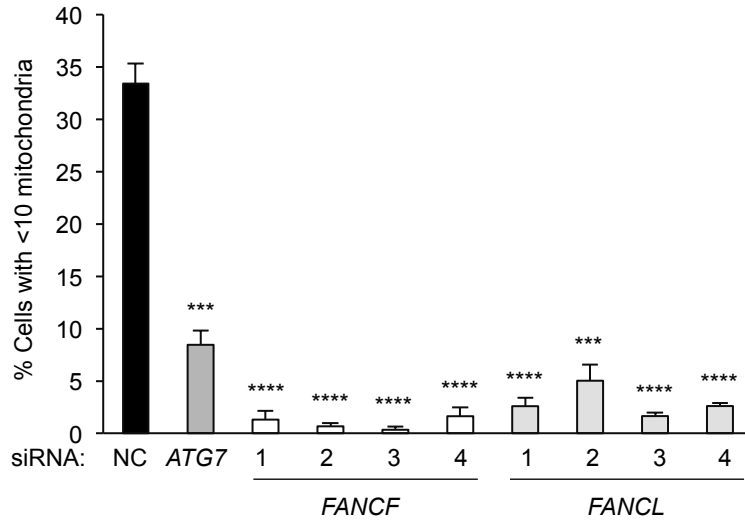

**B**

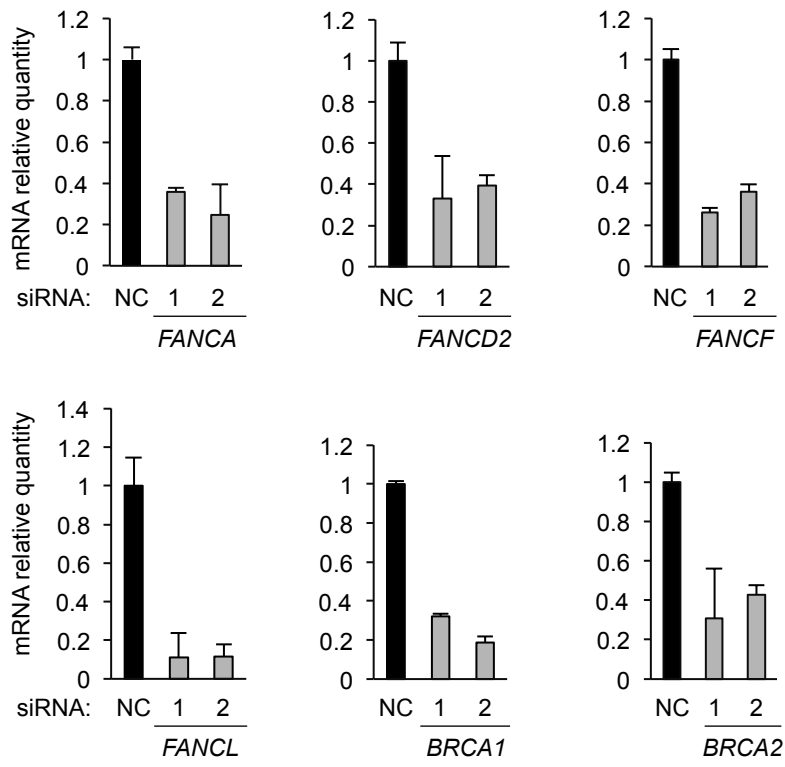

Supplement: NIHMS776370-supplement-7.pdf [file NIHMS776370-supplement-7.pdf]
